# Supplementary material
Source: publisher figshare collection journal article supplement (https://gsajournals.figshare.com/ndownloader/files/17436350)
Supplement: Supplementary file [file 17436350]

**Kocak *et al.***

**The *Drosophila melanogaster* PIF1 helicase promotes survival during replication stress  
and processive DNA synthesis during double-strand gap repair**

**Supplemental Figures 1-5**

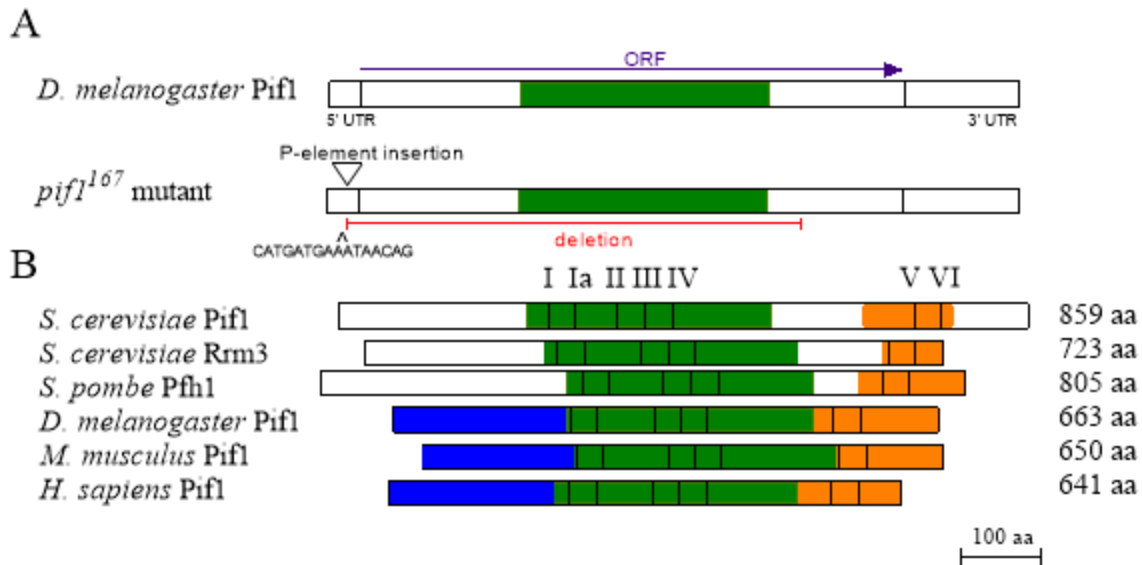

**Figure S1** – Creation of a *Drosophila pifl* mutant. (A) A large deletion that removes most of the *PIF1* coding sequence was created through imprecise excision of a *P* element inserted in the 5' UTR. The extent of the deletion is indicated by a red bar. A carat indicates an accompanying insertion at the deletion site. (B) Alignment of PIF1 orthologs from multiple species. The conserved helicase domain is shown in green, the conserved N-terminus in shown in blue, and the conserved C-terminal is shown in orange. The seven conserved helicase motifs are indicated in roman numerals and represented by black bars.

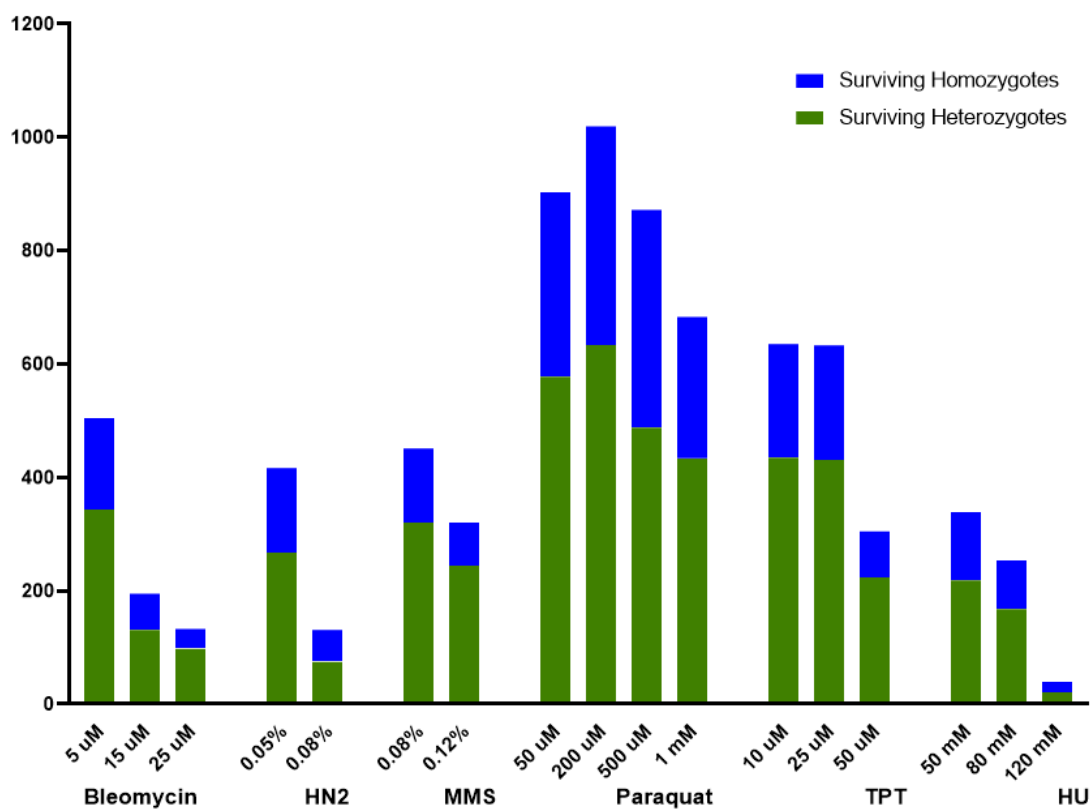

**Figure S2** – Numbers of surviving adults (both *pif1* heterozygotes and homozygotes) for increasing doses of bleomycin, nitrogen mustard (HN2), methyl methane sulfonate (MMS), paraquat, topotecan (TPT) and hydroxyurea (HU).

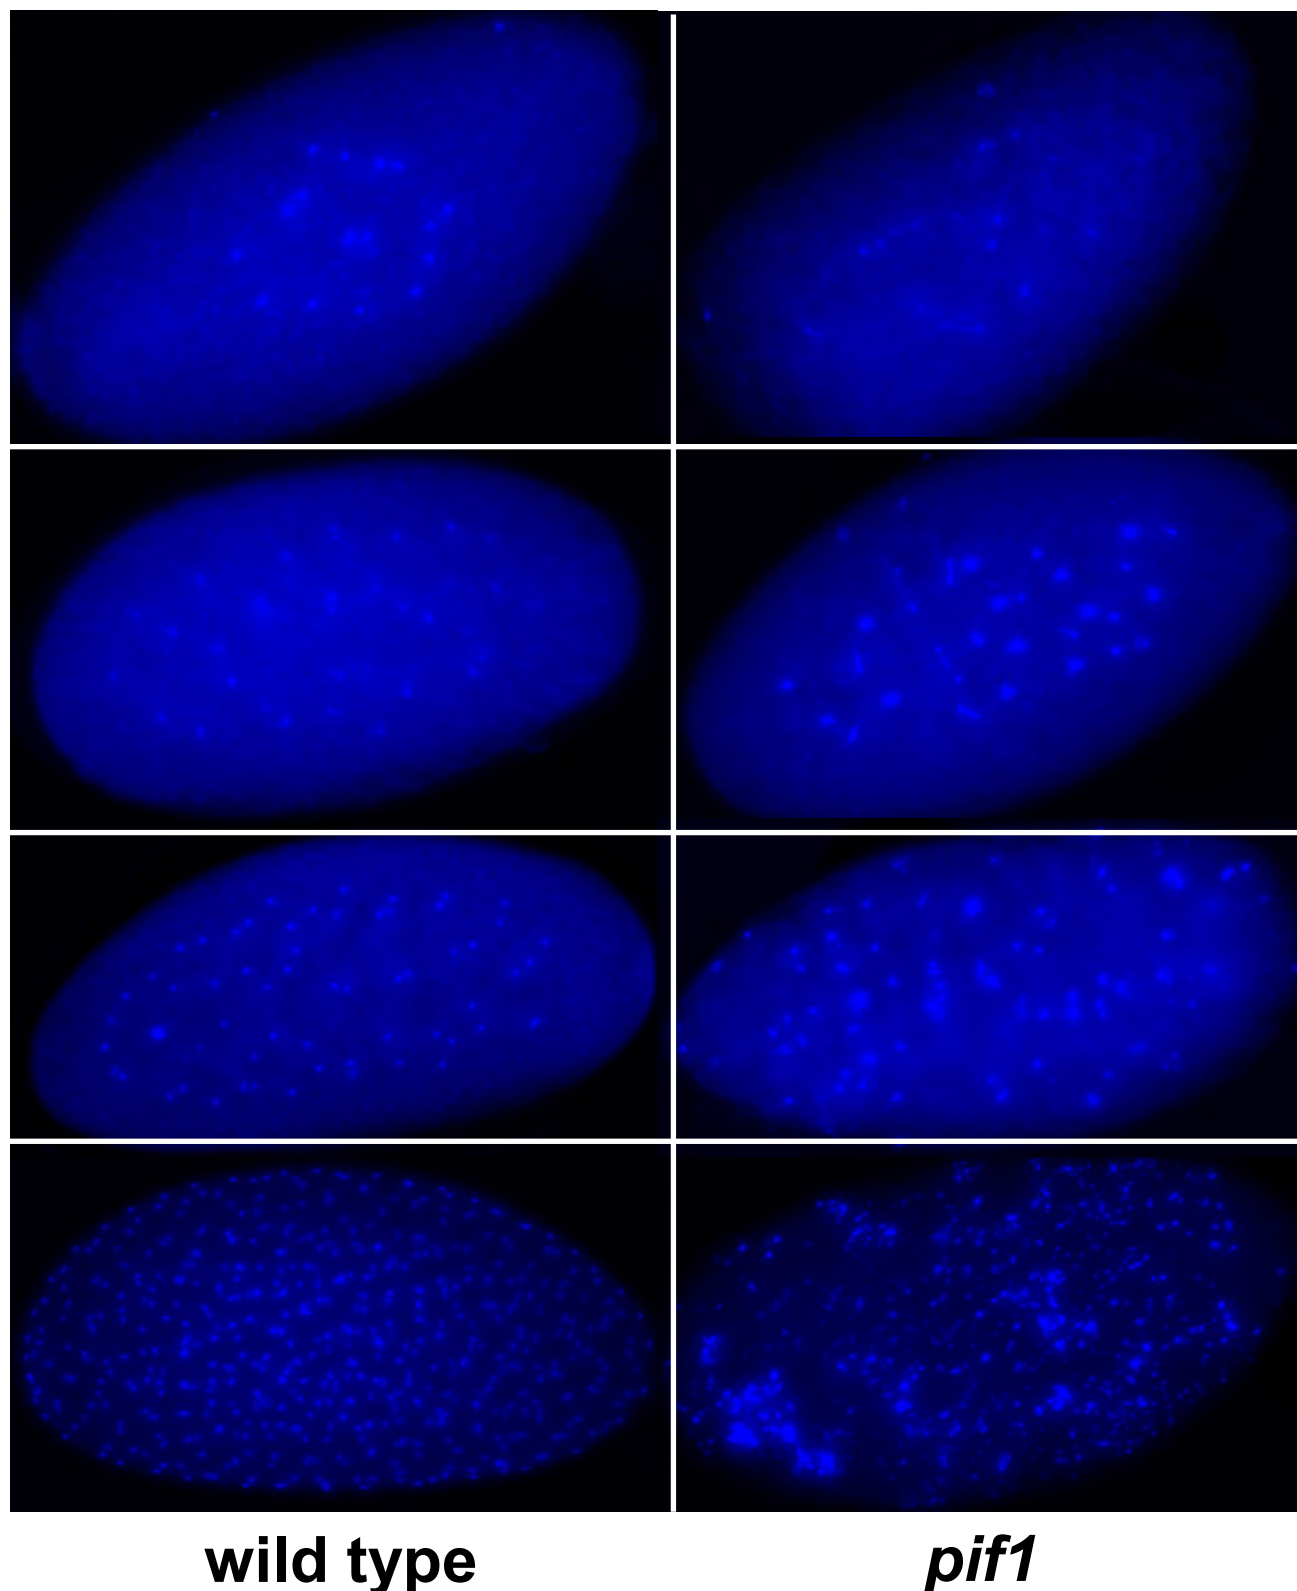

**Figure S3:** DAPI-stained embryos, showing defects in *pif1* mutants occur very early in embryogenesis.

|                                                                                                                             |                         |                                                   |                                  |
|-----------------------------------------------------------------------------------------------------------------------------|-------------------------|---------------------------------------------------|----------------------------------|
| $\text{♀♀ } y,w; pif1 \quad \times \quad \text{♂♂ } \frac{y,w^a, Ste^1}{B^s Y y^+}$                                         |                         |                                                   |                                  |
| ↓                                                                                                                           |                         |                                                   |                                  |
| Normal progeny<br>(X chromosome genotype)                                                                                   |                         | Nondisjunction progeny<br>(X chromosome genotype) |                                  |
| ♀♀                                                                                                                          | ♂♂                      | ♀♀                                                | ♂♂                               |
| $\frac{y,w}{y,w^a, Ste1}$                                                                                                   | $\frac{y,w}{B^s Y y^+}$ | $\frac{y,w/y,w}{B^s Y y^+}$                       | $\frac{y,w^a, Ste^1}{\emptyset}$ |
| WT 305                                                                                                                      | 144                     | 0                                                 | 1                                |
| <i>pif1</i> 32                                                                                                              | 13                      | 0                                                 | 1                                |
| NDJ for WT = $(1/450) \times 2 = 0.44\%$<br>NDJ for <i>pif1</i> = $(1/46) \times 2 = 4.4\%$<br>P = 0.0588 (Chi-Square test) |                         |                                                   |                                  |

**Figure S4:** *pif1* mutants have a non-significant increase in X chromosome nondisjunction. Wild type (WT) or *pif1* mutant females were mated to males of the indicated genotype. Gametes from females in which X chromosome nondisjunction occurred will be *yw/yw* or nullo-X. Fertilization of the *yw/yw* egg by a Y-bearing sperm will result in females with Bar-shaped eyes and wild-type body color. Fertilization of the nullo-X egg by an X-bearing sperm will result in males with normal-shaped eyes and yellow bodies. The frequency of non-disjunction is calculated by dividing the number of nondisjunction progeny by the total number of progeny and multiplying by 2 to account for the lethal combinations.

|          |                                                                       |                                   |                                   |                                                                       |
|----------|-----------------------------------------------------------------------|-----------------------------------|-----------------------------------|-----------------------------------------------------------------------|
| ♀♀       | <u><i>pif1</i><sup>167</sup></u> ; <u><i>rad51</i><sup>1057</sup></u> | x                                 | ♂♂                                | <u><i>pif1</i><sup>167</sup></u> ; <u><i>rad51</i><sup>1057</sup></u> |
|          | <u>CyO</u> ; <u>TM3,Sb</u>                                            |                                   |                                   | <u>CyO</u> ; <u>TM3,Sb</u>                                            |
|          | ↓                                                                     |                                   |                                   |                                                                       |
|          | <i>pif1</i> ; <i>rad51</i>                                            | <i>pif1</i> ; <u><i>rad51</i></u> | <u><i>pif1</i></u> ; <i>rad51</i> | <u><i>pif1</i></u> ; <u><i>rad51</i></u>                              |
|          |                                                                       | <u>TM3</u>                        | <u>CyO</u>                        | <u>CyO</u> <u>TM3</u>                                                 |
| Observed | 19                                                                    | 63                                | 35                                | 52                                                                    |
| Expected | 19                                                                    | 38                                | 38                                | 75                                                                    |

  

|          |                                                                       |                                    |                                    |                                                                       |
|----------|-----------------------------------------------------------------------|------------------------------------|------------------------------------|-----------------------------------------------------------------------|
| ♀♀       | <u><i>pol32</i><sup>L2</sup></u> ; <u><i>rad51</i><sup>1057</sup></u> | x                                  | ♂♂                                 | <u><i>pol32</i><sup>L2</sup></u> ; <u><i>rad51</i><sup>1057</sup></u> |
|          | <u>CyO</u> ; <u>TM3,Sb</u>                                            |                                    |                                    | <u>CyO</u> ; <u>TM3,Sb</u>                                            |
|          | ↓                                                                     |                                    |                                    |                                                                       |
|          | <i>pol32</i> ; <i>rad51</i>                                           | <i>pol32</i> ; <u><i>rad51</i></u> | <u><i>pol32</i></u> ; <i>rad51</i> | <u><i>pol32</i></u> ; <u><i>rad51</i></u>                             |
|          |                                                                       | <u>TM3</u>                         | <u>CyO</u>                         | <u>CyO</u> <u>TM3</u>                                                 |
| Observed | 8                                                                     | 14                                 | 47                                 | 31                                                                    |
| Expected | 11                                                                    | 22                                 | 22                                 | 44                                                                    |

**Figure S5:** Mutation of RAD51 is not lethal in a *pif1* or *pol32* mutant background. Females and males heterozygous for the indicated mutations were mated and the progeny that survived to adulthood were recorded.
